# Supplementary material for: Factors Associated with the 18-Month Cumulative Incidence of Seroconversion of Active Infection with Taenia solium Cysticercosis: A Cohort Study among Residents of 60 Villages in Burkina Faso
Source: PubMed Central journal article supplement (PMC6159582; doi:10.4269/ajtmh.18-0294), 2018-09-04
Supplement: tpmd180294.SD1.pdf [file tpmd180294.SD1.pdf]

ÉFÉ CAB

**Improving pig management to prevent epilepsy in Burkina Faso**

Centre Hospitalier Universitaire Souro Sanou, AFRICSanté & University of Oklahoma Health Sciences Center

**SCREENING QUESTIONNAIRE**

Last name : \_\_\_\_\_ First name : \_\_\_\_\_

Questionnaire number \_\_\_\_\_

Identification number |\_|\_|\_|\_|\_|\_|\_|\_|\_|\_|\_|\_|\_|\_|\_|\_|

Village \_\_\_\_\_

Concession \_\_\_\_\_

Household number \_\_\_\_\_

How long have you lived in this village? \_\_\_\_ (yrs.)

Do you benefit from a health insurance?  Yes  No

If yes, what type of health insurance is it?

Private Health insurance  Mutual Health insurance  Other [*specify*] \_\_\_\_\_

1 How old are you? \_\_\_\_\_ (years)

2 What is your date of birth? \_\_\_\_ Day \_\_\_\_ Month \_\_\_\_ Year

3 Sex  Male  Female

4. Did you go to a modern school?  Yes  No [*please go to Q6*]

5. What is the last grade you attended? \_\_\_\_\_

5.1 What is the highest schooling grade you have completed?

None  CEPE  BEPC  BEP/CAP

Baccalauréat  University degree

6 What is your usual occupation, in other word, what work do you do most of the time [*housewife is an occupation*]?

Farmer  Small business  Handicraft

Salaried (specify) \_\_\_\_\_  Housewife

Other (specify) \_\_\_\_\_

6.1 If you have a usual occupation, what is your monthly salary? \_\_\_\_\_ CFA

7 How many days of work have you missed because of illness in the past month? \_\_\_\_ days

7.1 If you do not have an official employment, how many days have you been unable to attend to your daily chores in the past month (past 30 days)? \_\_\_\_ days

7.2 What illness was it? \_\_\_\_\_

7.3 Did you have diarrhea (at least three episodes of liquid or loose stools in one day) during the past two weeks?  Yes  No

8 How many days of work have you missed because of illness in the past year (past 12 months)? \_\_\_\_\_ days

8.1 If you do not have an official employment, how many days have you been unable to attend to your daily chores in the past year (past 12 months)? \_\_\_\_\_ days

8.2 What illness(es) was it? \_\_\_\_\_

9 Where do you usually get your drinking water?

- Tap water  Open well  Traditional well  
 Drilled well  Spring  River / pool  Other (specify) \_\_\_\_\_

10 Do you boil your drinking water?

- Always  Almost always  
 Sometimes  Never

11 Do you eat pork meat?  Yes  No [Skip to Q11.a then Q13]

11.a If no, did you use to eat pork meat?  Yes  No

11.1 How often do you eat pork?

- At least once a month  Less than once a month but at least once a year  
 Less than once a year

12.1 How is the pork that you eat prepared? [Check all that apply.]

- Boiling  Barbeque  
 Fried  Others [Specify] \_\_\_\_\_

12.2 Have you ever eaten [Check all that apply.]

- Raw pork meat  Rare pork meat  
 Medium cooked pork meat  Well done pork meat  
 Cannot remember, do not know

12.3 Where do you usually eat pork meat [Check all that applies]

- At home  At another concession in the village  
 At the village's market  At another village's market  
 Other (specify) \_\_\_\_\_

13 Do use a latrine?

- 1 Yes  2 No [Skip to Q14]

13.1 How often do you use a toilet when you have to defecate?

- 1 Always                      2 Sometimes                      3 Never

15 Have you ever owned pigs (now or in the past)? [If they answer "yes", read options 1, 2 and 3]

- 1 Yes, in the past 12 months                      2 Yes, one (1) to five (5) years ago  
3 Yes, more than five (5) years ago  
4 No [Skip to Q 17]

16 Were you ever told that your pigs or piglets were infected with cysts (cysticercosis)?

- 1 Yes                      2 No [Skip to Q 17]

16.1. When were you told that your pig or piglets were infected with cysts (cysticercosis)?

- 1 In the past year                      2 One (1) to five (5) years ago  
3 More than five (5) years ago  
4 Never told (skip to Q 17)   5 Can not remember, do not know (Skip to Q 17)

17 Have you ever seen or heard of white nodules (rice) in pig carcasses?

- 1 Yes                      2 No [Skip to Q 18]

17.1 Where can you find nodules on a live pig?

- 1 It is not possible to find them on a live pig  
2 Under the skin                      3 Under the tongue  
4 I don't know                      5 Somewhere else [Specify] \_\_\_\_\_

17.2 How do pigs get these nodules?

- 1 By eating human faeces                      2 By eating pig faeces  
3 From another infected pig                      4 Other [Specify] \_\_\_\_\_  
5 I don't know

17.3 How did you hear about those nodules in pigs?

- 1 By a meat inspector                      2 By a pig trader  
3 BY a traditional healer                      4 At the radio / in the newspaper  
5 By a friend                      6 By ÉFÉCAB  
6 Other (spécify) \_\_\_\_\_

18 Have you ever heard of tapeworm infection in humans?

- 1 Yes                      2 No [Skip to Q 19]

18.1 How did you learn about it?

- 1 By a doctor                      2 By a friend or family member  
3 By a traditional healer                      4 On the radio / newspaper  
5 Other [Specify] \_\_\_\_\_

18.2 How does a person know if they have a tapeworm?

- 1 They can see it in their faeces    2 They have diarrhoea  
3 They have fever    4 Other [*Specify*] \_\_\_\_\_  
5 I don't know

18.3 Have you ever had a tapeworm or seen small parts (segments) of worms that look like rice grains in your faeces? (*Show photographs of proglottids*)

- 1 Yes    2 No [*Skip to Q 18.4*]  
3 I don't know/can not remember [*Skip to Q 18.4*]

18.3.1 When that happened, what did you do? [*check all that applies*]

- 1 Went to a primary health care provider (hospital, clinic, dispensary)  
2 Went to the pharmacy to get a drug to treat it  
3 Went to a traditional healer    4 Did nothing  
5 I can not remember, I do not know

18.4 How does a person get tapeworm infection?

- 1 They do not wash their hands    2 They eat undercooked pig meat  
3 They are in contact with an infected person    4 Other [*Specify*] \_\_\_\_\_  
5 I don't know

19 Have you ever had skin nodules or hard lumps under the skin? [*Show photograph of person with subcutaneous cysticercosis nodules*]

- 1 Yes, currently has    2 Yes in the past year, but not currently  
3 Yes, one year or more ago, but not currently    4 No  
5 Can not remember, do not know

20 Have you ever had bad headaches that did not go away and that got worse over time?

- Yes, currently has     Yes in the past year, but not currently  
 Yes, one year or more ago, but not currently     No [*Skip to Q21*]  
 Cannot remember, do not know [*Skip to Q21*]

20.1 Were these headaches bad enough to keep you from doing your daily chores, work or going to school?

- Yes     No     Can not remember, do not know

**[If any 'yes' to question 20 and 'yes' or 'can't remember/don't know' to question 20.1 – NOTE ON PDA that this person should be examined by the field doctor]**

20.2 How old were you when this type of headaches first happened?

- 1 I was a child (less than 15) and I was \_\_\_\_\_ years old



- 1 Only once                      2 More than once

21.2.2 How old were you when this first happened?

- I was a child (less than 15 years old) and I was \_\_\_\_\_ years old  
 I was a young adult (15-19 years old) and I was \_\_\_\_\_ years old  
 I was an adult (more than 20 years old) and I was \_\_\_\_\_ years old  
 Can not remember, do not know

21.2.3 When did it occur for the first time?

- During the past year (past 12 months)                       From 1 to 2 years ago  
 From 3 to 4 years ago                                                       At least 5 years ago  
 Can not remember, do not know

21.3 Uncontrollable twitching or jerking or abnormal movements of one or more limb(s) (convulsions) that starts suddenly and lasts for a period of a few minutes?

- 1 Yes, currently has                      2 Yes in the past year, but not currently  
3 Yes, one year or more ago, but not currently  
4 No [*Skip to Q 21.4*]                      5 Can not remember, do not know [*Skip to Q 21.4*]

**[If options 1,2, or 3 -- NOTE ON THE PDA that this person must be examined by the team doctor]**

21.3.1 How often has this happened?

- 1 Only once                      2 More than once

21.3.2 How old were you when this first happened?

- I was a child (less than 15 years old) and I was \_\_\_\_\_ years old  
 I was a young adult (15-19 years old) and I was \_\_\_\_\_ years old  
 I was an adult (more than 20 years old) and I was \_\_\_\_\_ years old  
 Can not remember, do not know

21.3.3 When did it occur for the first time?

- During the past year (past 12 months)                       From 1 to 2 years ago  
 From 3 to 4 years ago                                                       At least 5 years ago  
 Can not remember, do not know

21.4 Sudden onset of a brief period of hearing or smelling or seeing things that are not there or feeling strange body sensations?

- 1 Yes, currently has                      2 Yes in the past year, but not currently  
3 Yes, one year or more ago, but not currently  
4 No [*Skip to Q 21.5*]                      5 Can not remember, do not know [*Skip to Q 21.5*]

**[If options 1,2, or 3 -- NOTE ON THE PDA that this person must be examined by the team doctor]**

21.4.1 How often has this happened?

- 1 Only once                      2 More than once

21.4.2 How old were you when this first happened?

- I was a child (less than 15 years old) and I was \_\_\_\_\_ years old  
 I was a young adult (15-19 years old) and I was \_\_\_\_\_ years old  
 I was an adult (more than 20 years old) and I was \_\_\_\_\_ years old  
 Can not remember, do not know

21.4.3 When did it occur for the first time?

- During the past year (past 12 months)     From 1 to 2 years ago  
 From 3 to 4 years ago                       At least 5 years ago  
 Can not remember, do not know

21.5 Were you ever told that you had epilepsy or that you had had an epileptic seizure?

- 1 Yes, currently has                      2 Yes in the past year, but not currently  
3 Yes, one year or more ago, but not currently    4 No  
5 Can not remember, do not know

**[If options 1,2, or 3 -- NOTE ON THE PDA that this person must be examined by the team doctor]**

21.5.2 How old were you when this first happened?

- I was a child (less than 15 years old) and I was \_\_\_\_\_ years old  
 I was a young adult (15-19 years old) and I was \_\_\_\_\_ years old  
 I was an adult (more than 20 years old) and I was \_\_\_\_\_ years old  
 Can not remember, do not know

21.5.3 When were you told you had epileptic seizures or epilepsy for the first time?

- During the past year (past 12 months)     From 1 to 2 years ago  
 From 3 to 4 years ago                       At least 5 years ago  
 Can not remember, do not know

21.6 Have you ever had seizures or fits?

- 1 Yes, currently has                      2 Yes in the past year, but not currently  
3 Yes, one year or more ago, but not currently  
4 No [*Skip to Q 22*]                      5 Can not remember, do not know [*Skip to Q 22*]

21.6.1 How often has this happened?

- 1 Only once                      2 More than once

**[If options 1,2, or 3 -- NOTE ON THE PDA that this person must be examined by the team doctor]**

21.6.2 How old were you when this first happened?

- I was a child (less than 15 years old) and I was \_\_\_\_\_ years old
- I was a young adult (15-19 years old) and I was \_\_\_\_\_ years old
- I was an adult (more than 20 years old) and I was \_\_\_\_\_ years old
- Can not remember, do not know

21.6.3 When did it occur for the first time?

- During the past year (past 12 months)       From 1 to 2 years ago
- From 3 to 4 years ago                               At least 5 years ago
- Can not remember, do not know

***[If the interviewee has answered “no” to questions 20 to 21.6, the interview is finished. Go to last page and complete questions 30 & 31 based on observation.]***

**THANK YOU VERY MUCH FOR YOUR COOPERATION**

***[Otherwise, please continue with the questionnaire]***

22 Have you had any of the following?

22.1 Head injury that made you lose consciousness?     1 Yes     2 No *[Skip to Q 22.2]*

22.1.1 If yes, when did your seizure symptoms or headaches start?

- 1 Before head injury                               2 Soon after head injury
- 3 Long time after the head injury               4 Can not remember, do not know

22.2 Meningitis (brain infection) during childhood?     1 Yes     2 No

22.2.1 If yes, when did your seizure symptoms or headaches start?

- 1 Before meningitis                               2 Soon after meningitis
- 3 Long time after meningitis                       4 Can not remember, do not know

23 What happens to you when you have a seizure or a fit? \_\_\_\_\_

---



---

23.1 What happens to you when you have a headache? \_\_\_\_\_

---



---

24 Have you ever hurt yourself when you lose consciousness or during a seizure?

- 1 Yes                                               2 No
- 3 I do not lose consciousness or have seizures *[Skip to Q 25]*



4 Can not remember [*Skip to Q 25*]

24.1 If yes, how did you hurt yourself?

- 1 Fell in the fire                      2 Fell in the water  
3 Fell off your bicycle                4 Fell while walking along the road  
5 Cut yourself                              6 Other [*Specify*] \_\_\_\_\_

***(Interviewer: Read the following statement)***

**Now I want to ask you a few questions about your treatments for [*insert name of symptom or condition they reported having in questions 20 to 21.6. Note that there may be more than one condition that applies*]**

26 Have you ever consulted a health provider because of this condition?

- 2 No    [*Skip to Q 27*]                      3 Can not remember [*Skip to Q 27*]  
1 Yes

26.2 When was the last time you consulted a health provider for your condition?

- 1 Within the past month                      2 Within the past year  
3 From one (1) to five (5) years ago        4 More than five (5) years ago  
5 Can not remember, not sure

26.3 What kind of health provider(s) did you consult and how many times in the past 5 years [*check several boxes if appropriate*]?

- A health professional / \_\_\_\_\_ times    2 A traditional healer/ \_\_\_\_\_ times  
 Other (specify \_\_\_\_\_)/ \_\_\_\_\_ times  
 Can not remember, not sure

27 Have you ever been hospitalised because of this condition?

- No    [*Skip to Q 28*]                       Can not remember [*Skip to Q 28*]  
 Yes

27.1 When you were last hospitalized, did someone come with you?

- Yes                       No [*Skip to Q 27.2*]                       Can not remember [*Skip to Q 27.2*]

27.1.1 Who came with you

- 1 Mother                                      2 Father  
3 Brother/sister                              4 Children [*indicate how many*] \_\_\_\_\_  
5 Others (specify) \_\_\_\_\_

27.2 How many times have you been hospitalised in the past 5 years? \_\_\_\_\_ times

27.3 When were you last hospitalised? \_\_\_\_\_ (months)

27.3.1 How many days did you stay in hospital? \_\_\_\_\_ (days)

28. Did you ever have any medical tests because of this condition?

2 No [Skip to Q 29] 3 Cannot remember, do not know [Skip to Q 29]

1 Yes

28.2 What kind of test was it (check as many boxes as appropriate)?

1 Blood test

2 CT scan of the brain

3 X-Ray

6 Stool examination

8 Spit test

5 Other [specify] \_\_\_\_\_

7 Can not remember, not sure

28.3 When was the last time you had a medical test for this condition?

1 Within the past month

2 Within the past year

3 From one (1) to five (5) years ago

4 More than five (5) years ago

5 Can not remember, not sure

29. Have you ever taken medicine to treat this condition?

2 No [end of interview]

3 Can't remember, do not know [end of interview]

1 Yes

29.2 When was the last time you used medication for your condition?

1 Within the past month

2 Within the past year

3 From one (1) to five (5) years ago [end of interview]

4 More than five (5) years ago [end of interview]

5 Can not remember, not sure [end of interview]

29.3 What medication was it and how many times in the past year did you have to use some

(check several boxes if appropriate)?

1 Carbamazepine/Tegretol \_\_\_\_\_ times 2 Phenytoin/Dihydán \_\_\_\_\_ times

3 Valproic acid/Dépakin \_\_\_\_\_ times 4 Phenobarbital/Gardénal \_\_\_\_\_ times

5 Paracétamol \_\_\_\_\_ times at \_\_\_\_\_ mg each time

6 Paracétamol/dextropropoxyphène \_\_\_\_\_ times at \_\_\_\_\_ mg each time

7 Dihydroergotamine (Séglor, Tamik) \_\_\_\_\_ times at \_\_\_\_\_ mg each time

8 Laroxyl \_\_\_\_\_ times at \_\_\_\_\_ mg each time

9 Traditional medicine \_\_\_\_\_ times

10 6 Other (specify \_\_\_\_\_) \_\_\_\_\_ times

11 Can not remember, not sure

**THIS IS THE END OF THE INTERVIEW  
THANK YOU VERY MUCH FOR YOUR COOPERATION**

INTERVIEWER: \_\_\_\_\_ DATE OF INTERVIEW
