# Supplementary material for: Factors Associated with the 18-Month Cumulative Incidence of Seroconversion of Active Infection with Taenia solium Cysticercosis: A Cohort Study among Residents of 60 Villages in Burkina Faso
Source: PubMed Central journal article supplement (PMC6159582; doi:10.4269/ajtmh.18-0294), 2018-09-04
Supplement: tpmd180294.SD2.pdf [file tpmd180294.SD2.pdf]

**ÉFÉ CAB**

***Improving pig management to prevent epilepsy in Burkina Faso***

Centre Hospitalier Universitaire Souro Sanou, AFRICSanté & University of Oklahoma Health Sciences  
Center

**CHIEF OF HOUSEHOLD QUESTIONNAIRE**

Village \_\_\_\_\_

Concession \_\_\_\_\_

Household number \_\_\_\_\_

Last Name \_\_\_\_\_

First Name \_\_\_\_\_

1. How long have you lived in this village? \_\_\_\_\_ (yrs.)

2. How many people live in your concession? \_\_\_\_\_ (nb of people)

3. Where does your family usually get its drinking water?

Tap water

Open well

Bore-hole well

Traditional well

Drilled well

Spring

River / pool

Other (specify) \_\_\_\_\_

4. Is the household's drinking water boiled?

Always

Almost always

Sometimes

Never

5. What type of toilet does your household have?

Flushable toilet

Traditional latrine with a hole

Improved and ventilated latrine

No toilet / bushes / field

Other (specify) \_\_\_\_\_

6. Does your household own [*check all that applies*]?

Electricity

A radio

A television

A land line phone

A mobile phone

A refrigerator

7. What kind of fuel does your household use for cooking [*check all that applies*]?

Electricity

Bottle / natural gas

Biogas

Kerosene / oil

Coal

Wood / straw

Manure / cattle manure  Other (specify) \_\_\_\_\_
