# Supplementary material for: Factors Associated with the 18-Month Cumulative Incidence of Seroconversion of Active Infection with Taenia solium Cysticercosis: A Cohort Study among Residents of 60 Villages in Burkina Faso
Source: PubMed Central journal article supplement (PMC6159582; doi:10.4269/ajtmh.18-0294), 2018-09-04
Supplement: tpmd180294.SD3.pdf [file tpmd180294.SD3.pdf]

All my children  Other (specify) \_\_\_\_\_

15. Has a member of your household ever kept pigs? [*If they answer "yes", ask "How long ago did you own pigs?"*]

- No (skip to end of interview)  Yes, in the past year  
 Yes, one (1) to five (5) years ago  Yes, more than five (5) years ago

15.1. Who took care of the pigs when you had them?

- Me (mother)  My husband  
 One of my daughters  One of my sons  
 All my children  Other (specify) \_\_\_\_\_

**THIS IS THE END OF THE INTERVIEW  
 THANK YOU VERY MUCH FOR YOUR COOPERATION**

INTERVIEWER: \_\_\_\_\_ DATE OF INTERVIEW: \_\_\_\_\_

*Interviewers, please note the following characteristics regarding the household:*

16. What is the floor made of?

- Natural floor – earth / sand  Finished floor - cement  
 Finished floor – Tiles  Finished floor – vinyl / asphalt  
 Finished floor – carpet  Other (specify) \_\_\_\_\_

17. What is the roof made of?

- Straw  Mud  Sheet metal  
 Concrete  Other (specify) \_\_\_\_\_

18. What are the walls made of?

- Earthen bricks  Machine cut bricks  Stone  
 Fired bricks  Cement or concrete  Metal or sheet metal  
 Straw  Other (specify) \_\_\_\_\_
