# Supplementary material for: Factors Associated with the 18-Month Cumulative Incidence of Seroconversion of Active Infection with Taenia solium Cysticercosis: A Cohort Study among Residents of 60 Villages in Burkina Faso
Source: PubMed Central journal article supplement (PMC6159582; doi:10.4269/ajtmh.18-0294), 2018-09-04
Supplement: tpmd180294.SD4.pdf [file tpmd180294.SD4.pdf]

ÉFÉ CAB

*Improving pig management to prevent epilepsy in Burkina Faso*

Centre Hospitalier Universitaire Sourou Sanou, AFRICSanté & University of Oklahoma Health Sciences Center

**PIG QUESTIONNAIRE**

District \_\_\_\_\_

Village \_\_\_\_\_

Hut (house) number \_\_\_\_\_

Last name : \_\_\_\_\_ First Name : \_\_\_\_\_

1. What is your position in the household?

Mother

Father

One of the daughters

One of the sons

Other [*Specify*] \_\_\_\_\_

2. How many pigs do you keep? \_\_\_\_\_  Does not know number

2a. What type of pigs do you keep [*indicate number of each type*]

Foreign \_\_\_\_\_

Indigenous \_\_\_\_\_

Other (specify) \_\_\_\_\_

2b. Where do you usually buy your pigs and how much do you pay?

I never buy pigs, I use the ones my own sows deliver

From another farmer in my village and I pay \_\_\_\_\_

From a farmer in a neighboring village \_\_\_\_\_ [*indicate village*

*name*] and I pay \_\_\_\_\_

At the market in another village \_\_\_\_\_ [*indicate village name*] and I

pay \_\_\_\_\_

Other [*Specify*] \_\_\_\_\_

3. How many of these pigs are owed by your household ? \_\_\_\_\_ [*indicate a number*]

4. Among the pigs owned by your household, how many are kept for [*read each option and indicate the number kept for that reason*]

Home eating \_\_\_\_\_

Sell live animals (not to abattoir) \_\_\_\_\_

Sell the meat to someone else \_\_\_\_\_

Sell the pig to the abattoir \_\_\_\_\_

Reproduction [*Go to 4.1*] \_\_\_\_\_

Other [*Specify*] \_\_\_\_\_

4.1 How many piglets did the last sow that gave birth have? \_\_\_\_\_

4.2 How many times did you need to take her to the boar before she got pregnant? \_\_\_\_\_

4.3 How many litters in the past 12 months did the last sow that deliver have? \_\_\_\_\_

5. How do you keep your pigs? [read questions 5.1 to 5.2 one by one]

5.1 During the rainy season

- In a pen  Free range  
 Tethering (tied up?)  Other [Specify]\_\_\_\_\_

5.2 During the dry season

- In a pen  Free range  
 Tethering  Other [Specify]\_\_\_\_\_

6. What do your pigs eat? [check all that apply]

- Pasture  Slop (from dolo or beer)  
 Kitchen leftovers  Commercial feeds  
 Other [Specify]\_\_\_\_\_

7. How often do you slaughter pigs at home?

- Never [Skip to Q 8]  Cannot remember, do not know [Skip to Q8]  
 At least once a month  Less than once a month but at least once a year  
 Less than once a year

7.1 If ever, how often was the meat inspected by a meat inspector?

- Always  Almost always  
 Sometimes  Never  
 Cannot remember, do not know

8. At what price do you usually sell your pigs when they are ready to be slaughtered [specify the usual weight, currency used, this can be money or barter]?

\_\_\_\_\_

9. At what price do you usually sell your piglets around weaning (aged 4 months or less) [specify the currency used, this can be money or barter]?

\_\_\_\_\_

10. For what do you use the profits from selling your pigs ? [check all that apply]

- To send children to school  To buy food  
 To invest in a business  For savings  
 To treat a health problem  
 Other [Specify]\_\_\_\_\_

11. Have you ever seen or heard of white nodules (rice) in pig carcasses?

- Yes  No [Interview is over]

11.1 Where can you find nodules on a live pig?

- It is not possible to find them on a live pig

- Under the skin                       Under the tongue  
 I don't know                       Somewhere else [*Specify*]\_\_\_\_\_

11.2 How do pigs get these nodules?

- By eating human faeces                       By eating pig faeces  
 From another infected pig                       Other [*Specify*] \_\_\_\_\_  
 I don't know

11.3 What would you do if you discovered that your pig had these nodules?

- Sell the pig                       Treat it with herbs  
 Pierce the nodules                       Other [*Specify*] \_\_\_\_\_  
 I don't know

12. At what price would you be able to sell pigs that have nodules [*specify the usual weight, currency used, this can be money or barter*]? \_\_\_\_\_

13. At what price would you be able to sell piglets around weaning if they have nodules (aged 4 months or less) [*specify the currency used, this can be money or barter*]?  
\_\_\_\_\_

**THIS IS THE END OF THE INTERVIEW  
THANK YOU VERY MUCH FOR YOUR HELP**

14. [*Interviewer, indicate how many adult pigs were kept in each way listed below during the interview*]

- In a pen \_\_\_\_\_                       Free range \_\_\_\_\_  
 Tethered \_\_\_\_\_                       Other [*Specify*]\_\_\_\_\_

15. [*Interviewer, indicate how many adult piglets were kept in each way listed below during the interview*]

- In a pen \_\_\_\_\_                       Free range \_\_\_\_\_  
 Tethered \_\_\_\_\_                       Other [*Specify*]\_\_\_\_\_

16. Indicate the gender of the pig sampled for a blood sample \_\_\_\_\_

17. Indicate the gender of the pig sampled for a blood sample \_\_\_\_\_

18. Indicate the approximate age of the pig sample for a blood sample \_\_\_\_\_

INTERVIEWER: \_\_\_\_\_ DATE OF INTERVIEW: \_\_\_\_\_
